# Supplementary material for: General control nonderepressible 1 interacts with cationic amino acid transporter 1 and affects Aedes aegypti fecundity
Source: PubMed Central journal article supplement (PMC9587632; doi:10.1186/s13071-022-05461-x), 2022-10-21

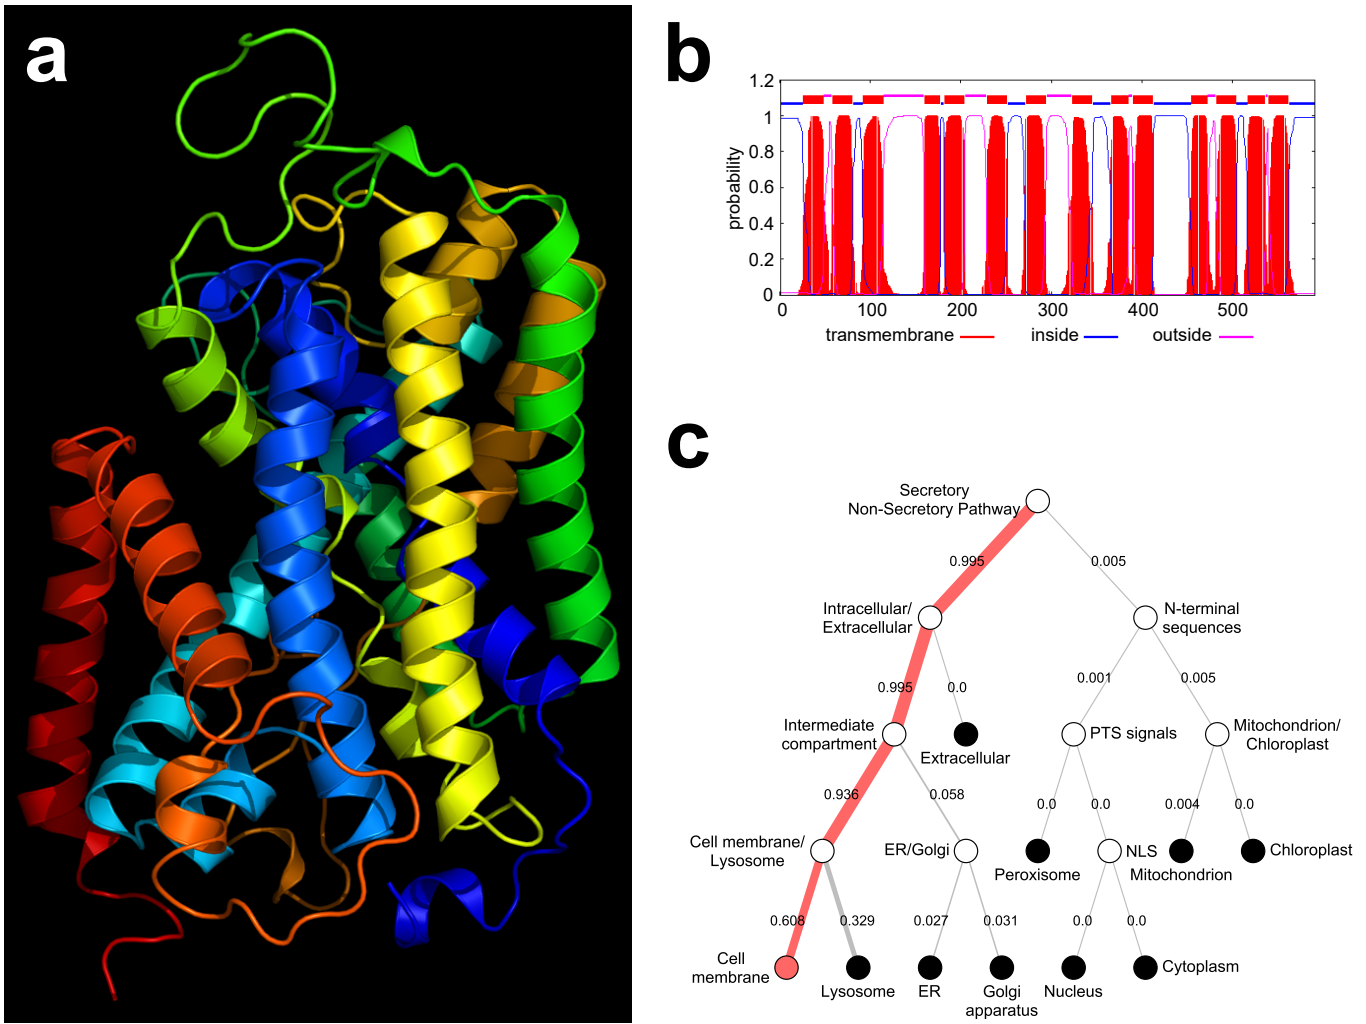

**Figure S1. *Ae. aegypti* AaCAT1 is a transmembrane protein that localizes to the plasma membrane.** **a.** Tertiary structure of the AaCAT1 protein was visualized using PyMOL (<https://pymol.org/2/>). **b.** The TMHMM transmembrane prediction tool, Krogh et al. [39] was used to predict the transmembrane domains, and intracellular and extracellular regions of AaCAT1 to design the bait fragment for yeast two-hybrid analysis. **c.** AaCAT1 is predicted to localize to the plasma membrane as determined by the DeepLoc-1.0 subcellular localization tool, Almagro Armenteros et al. [52].

**Table S1. Annotations of all CAT entries used for CAT annotation tree.**

| Entrez ID      | Annotation                               | Organism               | Proposed re-annotation            | Source                                    |
|----------------|------------------------------------------|------------------------|-----------------------------------|-------------------------------------------|
| XP_001662273.1 | AaCAT1                                   | <i>Ae. aegypti</i>     |                                   | Hansen et al. 2011, Carpenter et al. 2012 |
| XP_001659995.1 | AaCAT2                                   | <i>Ae. aegypti</i>     |                                   | Carpenter et al. 2012                     |
| XP_001662274.1 | AaCAT3                                   | <i>Ae. aegypti</i>     |                                   | Carpenter et al. 2012                     |
| XP_001659990.1 | AaCAT4                                   | <i>Ae. aegypti</i>     |                                   | Carpenter et al. 2012                     |
| XP_001661832.1 | AaCAT5                                   | <i>Ae. aegypti</i>     |                                   | Carpenter et al. 2012                     |
| 5575859        | Cationic amino acid transporter 2        | <i>Ae. aegypti</i>     | Cationic amino acid transporter 1 |                                           |
| 5571884        | Cationic amino acid transporter 2        | <i>Ae. aegypti</i>     |                                   |                                           |
| 5575863        | Cationic amino acid transporter 3        | <i>Ae. aegypti</i>     |                                   |                                           |
| 5575110        | Cationic amino acid transporter 3        | <i>Ae. aegypti</i>     | Cationic Amino acid transporter 5 |                                           |
| 5575860        | Cationic amino acid transporter 4        | <i>Ae. aegypti</i>     |                                   |                                           |
| AAT73699.1     | Cationic amino acid transporter slimfast | <i>Ae. aegypti</i>     |                                   | Attardo et al. 2006                       |
| AKN80692.1     | Slimfast                                 | <i>Ae. aegypti</i>     |                                   | Boudko et al. 2015                        |
| AAZ07714.1     | iCAT2                                    | <i>Ae. aegypti</i>     |                                   | Attardo et al. 2006                       |
| 5568181        | Probable cationic amino acid transporter | <i>Ae. aegypti</i>     |                                   |                                           |
| 35370          | Torn and diminished rhabdomeres          | <i>D. melanogaster</i> |                                   |                                           |
| 40510          | Slimfast                                 | <i>D. melanogaster</i> |                                   |                                           |
| 39622          | CG7255                                   | <i>D. melanogaster</i> |                                   |                                           |
| 39990          | CG5535                                   | <i>D. melanogaster</i> |                                   |                                           |
| 40254          | CG13248                                  | <i>D. melanogaster</i> |                                   |                                           |
| 32986          | CG12531                                  | <i>D. melanogaster</i> |                                   |                                           |

Entrez gene IDs are provided for all current gene annotations, and protein IDs are provided for previous annotations. Proposed re-annotations are based on MEGA, Tamura et al. [38] multiple sequence alignment and neighbor-joining tree analysis presented in Fig. 1a.

**Table S2. Potential protein interactors identified from AaCAT1 yeast two-hybrid screen.**

| <b>Identified potential prey interactors</b>                                                           | <b>Number of hits</b> | <b>NCBI Accession number</b> | <b>Location in the cell</b>                                               |
|--------------------------------------------------------------------------------------------------------|-----------------------|------------------------------|---------------------------------------------------------------------------|
| eIF-2-alpha kinase activator GCN1                                                                      | 3                     | XP_001651826.2               | Cytoplasm/<br>Ribosome                                                    |
| Sodium/potassium-transporting ATPase subunit beta-2                                                    | 3                     | XP_001654893.1               | Plasma membrane                                                           |
| PREDICTED: Aedes aegypti long-chain-fatty-acid--CoA ligase 4 (LOC5574220), transcript variant X4, mRNA | 2                     | XM_021849348.1               | Peroxisome/<br>Mitochondria/<br>Plasma membrane/<br>Endoplasmic reticulum |
| Serine protease SP24D                                                                                  | 2                     | XP_001659969.2               | Cytoplasm/<br>Extracellular region                                        |
| Protein dj-1beta                                                                                       | 2                     | XP_001648396.2               | Cytoplasm/<br>Mitochondria/<br>Nucleus                                    |
| Serine/threonine-protein phosphatase 6 catalytic subunit                                               | 1                     | XP_001648846.1               | Cytoplasm/<br>Mitochondria                                                |
| 14-3-3 protein zeta isoform X1                                                                         | 1                     | XP_001652301.1               | Cytoplasm/<br>Endosome                                                    |
| PREDICTED: Aedes aegypti prostatic acid phosphatase (LOC5563717), transcript variant X3, mRNA          | 1                     | XM_021837530.1               | Cytoplasm                                                                 |
| Chymotrypsin-like protein                                                                              | 1                     | AAL85585.1                   | Cytoplasm                                                                 |
| trypsin 3A1 isoform X1                                                                                 | 1                     | XP_001652943.1               | Cytoplasm                                                                 |
| PREDICTED: Aedes aegypti serine protease easter (LOC5569890), mRNA                                     | 1                     | XM_001658734.3               | Cytoplasm                                                                 |
| Annexin B9 isoform X5                                                                                  | 1                     | XP_021708898.1               | Cytoplasm/<br>Endomembrane system                                         |
| Guanine nucleotide-binding protein subunit beta-like protein                                           | 1                     | XP_001663282.1               | Cytoplasm                                                                 |

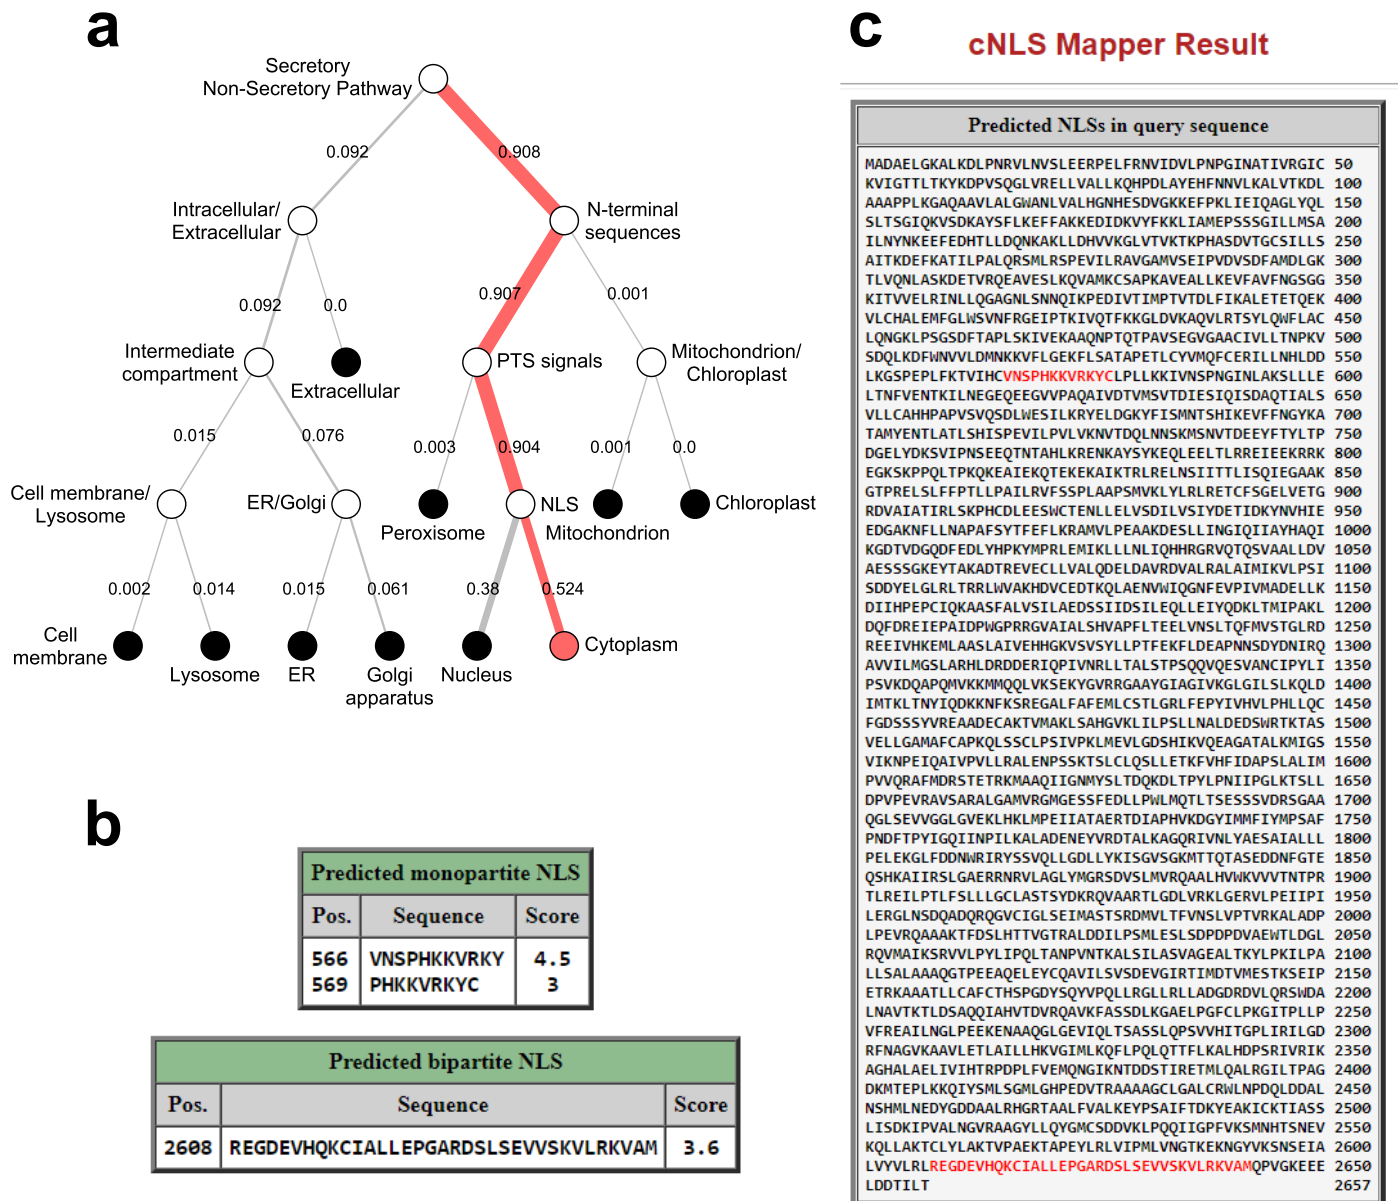

**Figure S2. *In silico* predictions of GCN1 subcellular localization.** **a.** GCN1 is predicted to localize to the cytoplasm, but also may localize to the nucleus. **b.** Predicted nuclear localization sequences (NLS) found in GCN1 reveal several NLS with scores indicating a mixed nuclear-cytoplasmic localization pattern. **c.** Result from part b showing location of predicted NLS within the context of the GCN1 amino acid sequence.

Subcellular localization prediction was performed using the DeepLoc-1.0 subcellular localization tool, Almagro Armenteros et al. [52]. NLS prediction was performed using the cNLS Mapper prediction tool, Kosugi et al. [54].

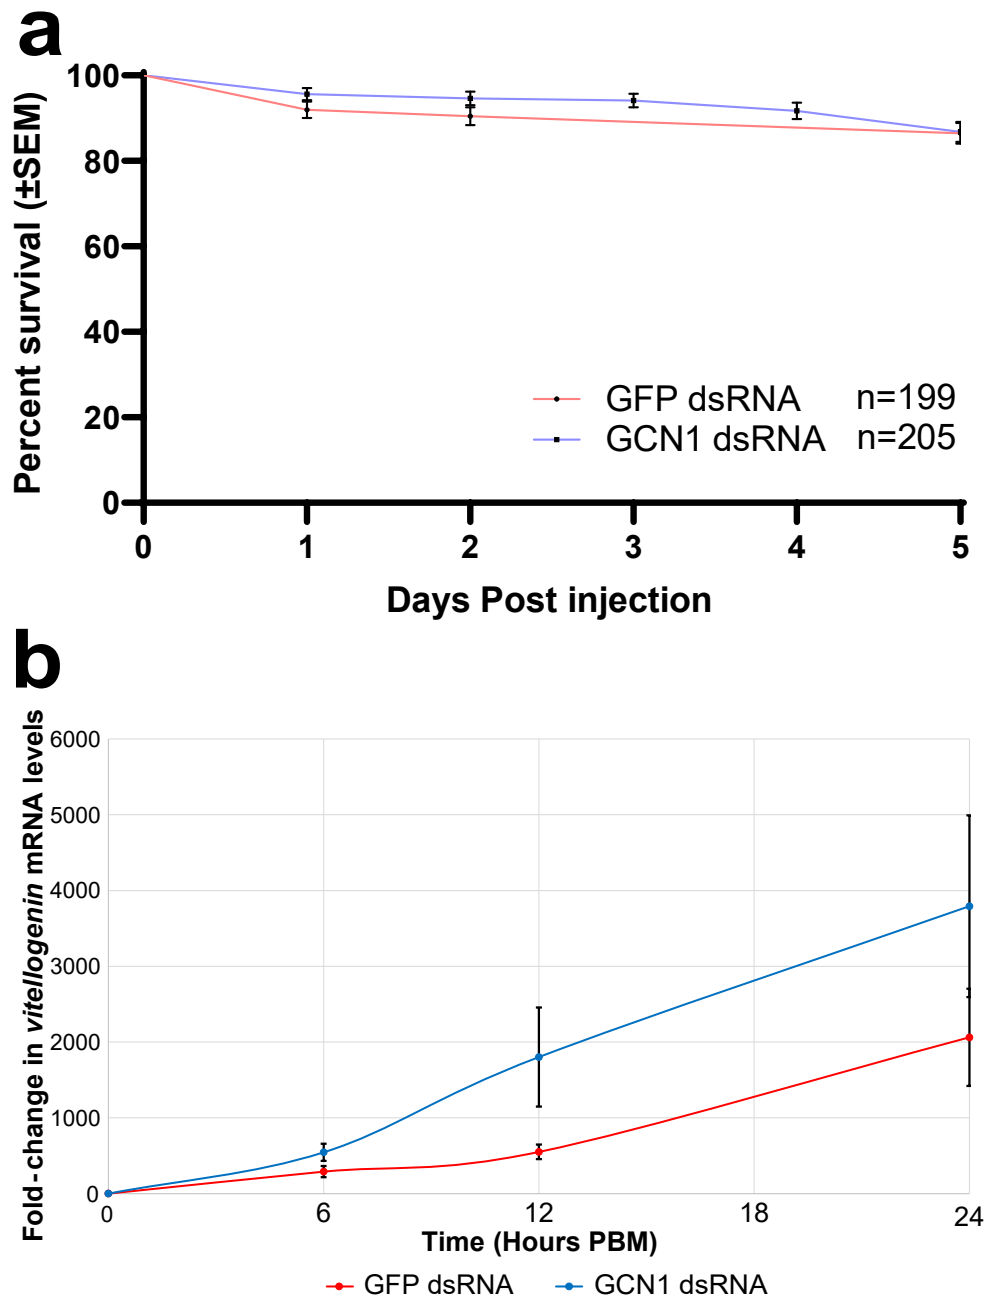

**Figure S3. GCN1 knockdown is not lethal, and does not affect YPP transcription. a.**

Survival of GCN1 dsRNA-injected and GFP dsRNA-injected control mosquitoes was not significantly different up to five days post-injection. A log-rank Mantel-Cox test was used to test for significant differences between the two treatments. **b.** qRT-PCR analysis of *vg* transcription in GCN1 dsRNA-injected and GFP dsRNA-injected control mosquitoes. Three biological replicates were analyzed per treatment at each time point and *vg* mRNA levels were normalized to  $\beta$ -*actin* mRNA prior to calculating fold-change in *vg* expression through the first 24 hr PBM. Paired t-tests were used to test for significant differences between the two treatments at each time point.

**Figure S4.** The following pages contain Western blot and Coomassie blue images used in main figures without cropping, color removal, and brightness/contrast correction. The label above each image contains a reference to the main text figure where the image is included.

**Figure S4a.** Cross-link Coomassie stain gel (Fig. 1e).

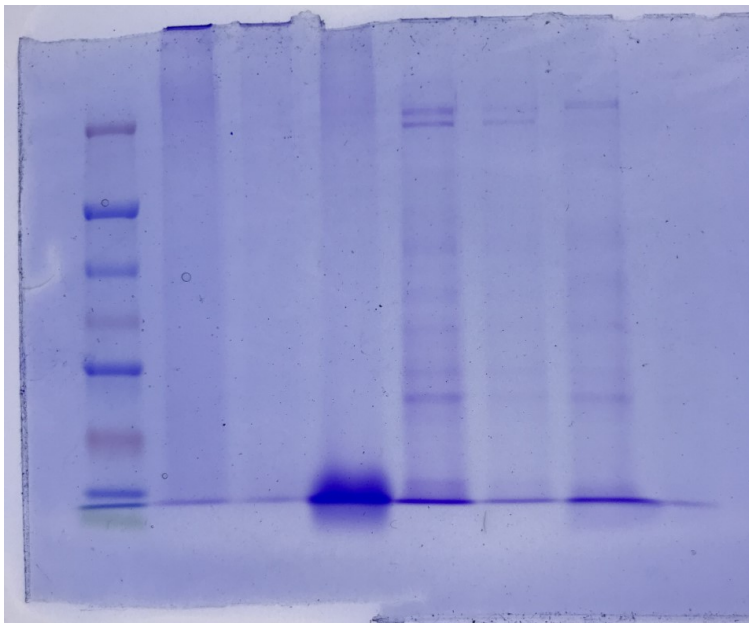

**Figure S4b.** Pulldown Western Blot (Fig. 1f).

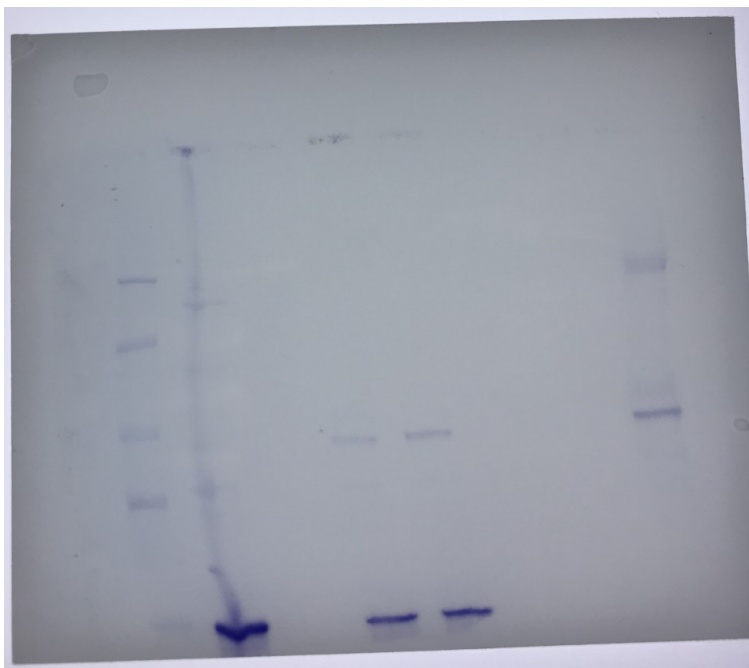

**Figure S4c.** GCN1 expression in adult tissues (Fig. 2a bottom).

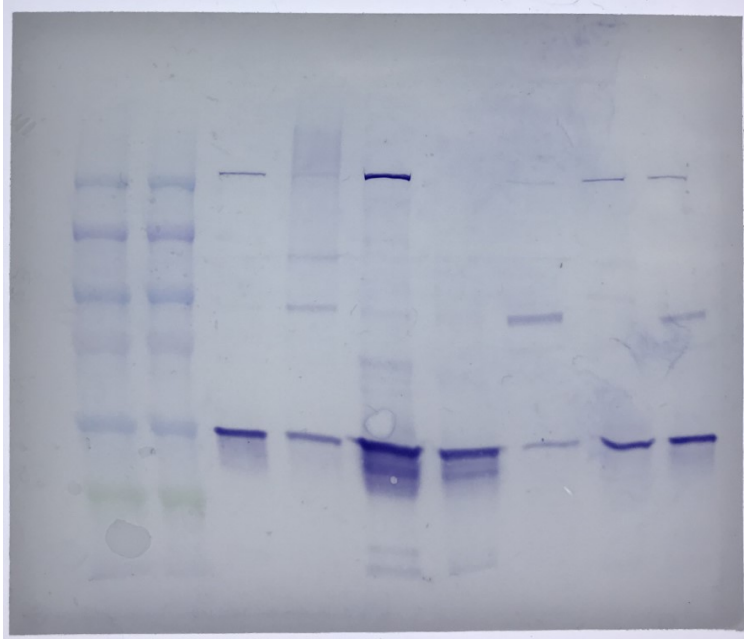

**Figure S4d.** Confirmation of GCN1 dsRNA knockdown (Fig. 2b).

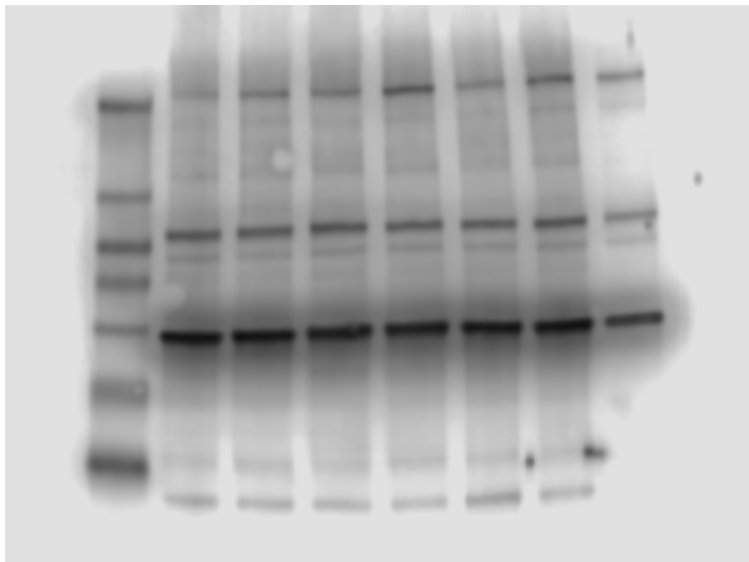



**Figure S4e.** Phospho-eIF2 $\alpha$  Western blots (Fig. 2d top).

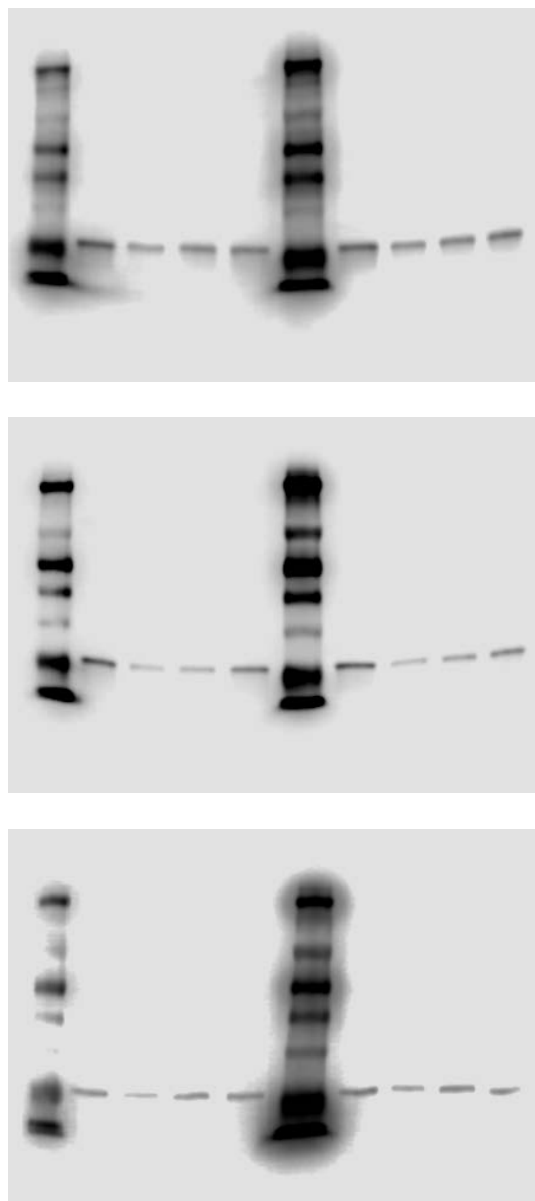

**Figure S4f . eIF2 $\alpha$  Western blots**  
(Fig. 2d middle).

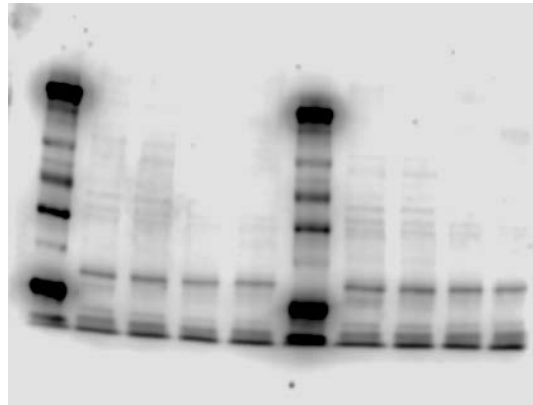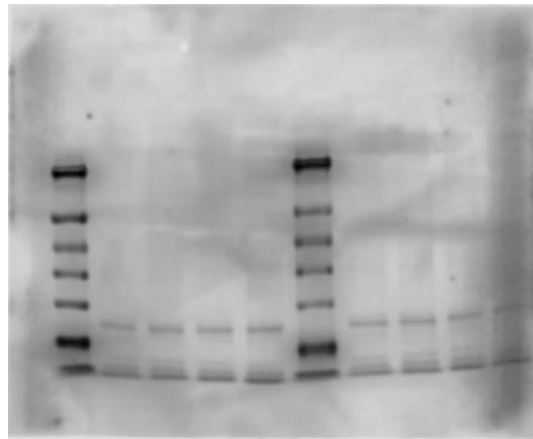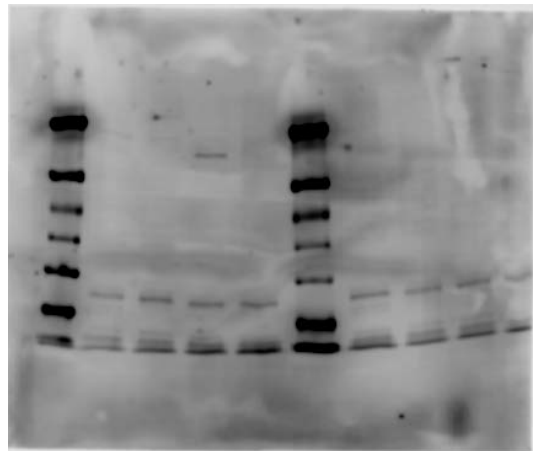

**Figure S4g.** Actin Western Blots  
(Fig. 2d bottom).

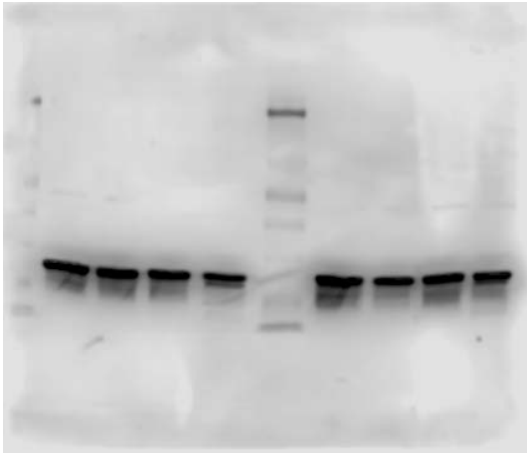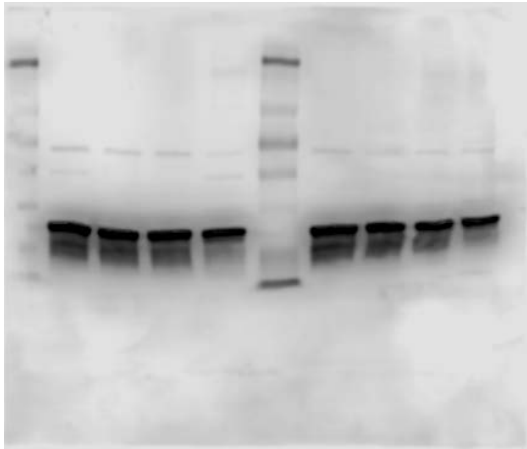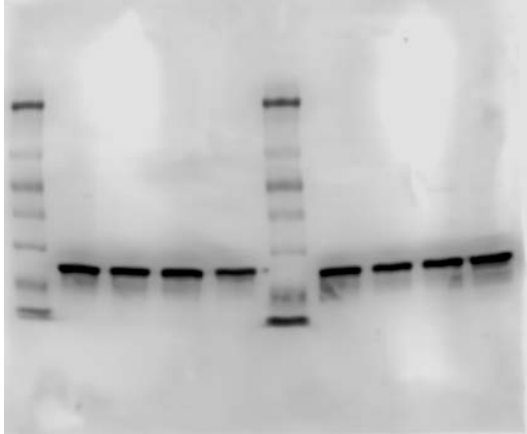

Supplement: 13071_2022_5461_MOESM1_ESM.pdf [file 13071_2022_5461_MOESM1_ESM.pdf]
